# Supplementary material
Source: Research Square preprint supplement (doi:10.21203/rs.3.rs-8604727/v1)
Supplement: Supplementary file 1 [file 0efed0b52cf9129c9b688482.docx]

Supplementary file 1: List of available personal recovery measures

| **Name (instrument)** | **Items** | **Constructs** |
| --- | --- | --- |
| Questionnaire about the Process of Recovery (QPR) | 22 Items, five points Likert scale   - Strongly disagree to strongly agree | - Intrapersonal - Interpersonal |
| Consumer Recovery Outcomes System (CROS 3.0) | 38 items, five-point Likert scale   - Very satisfied to very dissatisfied | - Hope for the future - Daily function - Coping with clinical symptoms - Quality of life - Treatment satisfaction - Medication and substance |
| Illness Management and Recovery Scale (IMR) | 1. items, five-point Likert scale  - Not at all to a very great extent | - Illness self-management - Severity of problems - Functioning - Hope. |
| Modified Engulfment Scale (MES) | 1. items, five-point Likert scale  - Completely false to completely true | - Self-concept |
| Mental Health Recovery Measure (MHRM) | 1. items, five-point Likert scale  - Strongly disagree to strongly agree | - Recovery process |
| Ohio Mental Health Consumer Outcomes System (Ohio Outcomes System) | 67 items   - 4- or 5-point Likert scale | - Quality of Life - Safety and Health - Symptom Distress - Empowerment |
| Schizophrenia Patient Outcomes Research Team Scale (PORT-Scale) | 49 items   - 4, 5 or 7 point Likert scale | - Knowledge - Empowerment - Hope and optimism - Life satisfaction |
| Psychosis Recovery Inventory (PRI) | 25 core items, six-point Likert scale   - Strongly disagree to strongly agree | - Perception of Relapse and Recovery - Attitudes to Illness - Attitude to Treatment |
| Recovery Assessment Scale (RAS) | 1. items, five-point Likert scale  - Strongly disagree to strongly agree | - Personal confidence and hope - Willingness to ask for help - Goal and success orientation - Reliance on others |
| Recovery Attitudes Questionnaire - 7 (RAQ-7) | 1. Items, five-point Likert Scale  - Strongly agree to strongly disagree | - Attitude |
| Recovery Process Inventory (RPI) | 1. items, five-point Likert scale  - Strongly disagree to strongly agree | - Anguish - Connected to Others - Confidence and purpose - Others’ care and help - Living situation - Hopeful/cares for Self |
| Recovery Style Questionnaire (RSQ) | 39 items   - Disagree and agree | - Sealing-over - Integration |
| Stages of Recovery Instrument (STORI) | 1. Items, six-point Likert scale  - Not true at all now to completely true now | - Hope - Identity - Meaning - Responsibility |
| Self-Identified Stage of Recovery (SISR) | 9 statements, six-point scale  - Disagree strongly to agree strongly | - Stage of recovery - Component processes of recovery |
| Subjective Recovery Assessment Scale (SubRAS) | 1. Items, five-point scale  - Not relevant to highly relevant | - Personal goals |
| Measure of Individual Mental Health Recovery for a South African Context (MIMHR-SA) | 38 items, five-point scale   - Not at all to completely | - Individuals experience - Social and cultural factors |
| Skala Pemulihan Pasien Skizofrenia (SPPS)/Indonesian Recovery Scale for Patients with Schizophrenia (I-RSPS) | 40 items, five-point scale   - Strongly disagree to strongly agree | - Social life - Joy and Satisfaction - Happiness and Meaning - Acceptance - Self-control - Productivity and Role - Activities and Routines - Independence and Responsibility - Self-care - Hope |
